# Supplementary material for: An effective route for manufacturing a mushroom-derived carbon/SnO2/C functional composite
Source: Royal Society of Chemistry journal article supplement (doi:10.1039/c9nj02049g), 2019-01-01
Supplement: c9nj02049g1.pdf [file c9nj02049g1.pdf]

## Supporting Information

### An effective route for manufacturing the mushroom-derived carbon/SnO<sub>2</sub>/C functional composite

Qigang Han<sup>a, b</sup>, Yao Li<sup>a</sup>, Zhiwu Han<sup>c\*</sup>, Wenqiang Zhang<sup>a</sup>, Xiang Li<sup>a</sup>, Di Geng<sup>a</sup>, Xu Zhang<sup>a</sup>

<sup>a</sup> Roll Forging Research Institute, School of Materials Science and Engineering, Jilin University, Changchun 130022, P. R. China

<sup>b</sup> State Key Laboratory of Automotive Simulation and Control, Jilin University, Changchun 130022, P. R. China

<sup>c</sup> Key Laboratory of Bionic Engineering (Ministry of Education), Jilin University, Changchun 130022, Jilin, P. R. China

\* Corresponding author.

E-mail address: [zwhan@jlu.edu.cn](mailto:zwhan@jlu.edu.cn) (Zhiwu Han). Tel. / fax: +86 431 85094340

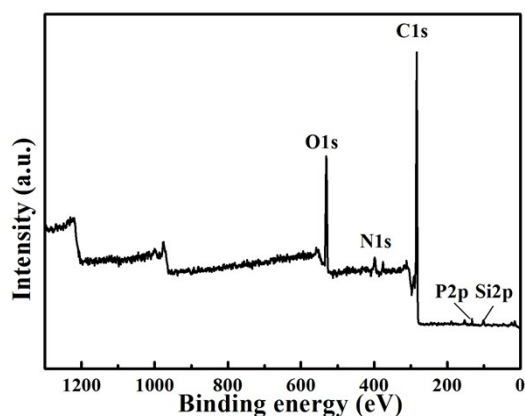

Fig. S1. The XPS results of MC survey scan.

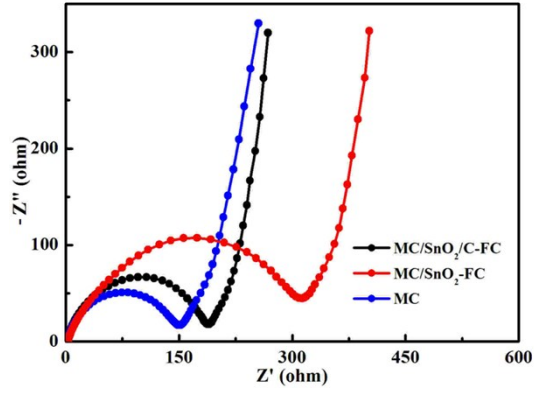

Fig. S2. EIS plots of MC, MC/SnO<sub>2</sub>-FC and MC/SnO<sub>2</sub>/C-FC.

Table S1. Elemental compositions and the content (at. %) of MC and MC/SnO<sub>2</sub>/C-FC.

| Sample                    | Element | Content (at. %) |
|---------------------------|---------|-----------------|
| MC                        | C 1s    | 75.51           |
|                           | O 1s    | 14.47           |
|                           | N 1s    | 6.79            |
|                           | Si 2p   | 2.07            |
|                           | P 2p    | 1.16            |
| MC/SnO <sub>2</sub> /C-FC | C 1s    | 68.31           |
|                           | O 1s    | 24.51           |
|                           | Sn 3d   | 7.18            |
